# Supplementary material for: Bi(nanoparticles)/CNx(nanosheets) nanocomposites as high capacity and stable electrode materials for supercapacitors: the role of urea
Source: Royal Society of Chemistry journal article supplement (doi:10.1039/d0dt02073g), 2020-01-01
Supplement: d0dt02073g1.pdf [file d0dt02073g1.pdf]

## Electronic Supplementary Information (ESI)

### **Bi(nanoparticles)/CN<sub>x</sub>(nanosheets) nanocomposites as high capacity and stable electrode materials for supercapacitors: the role of urea**

Denys S. Butenko,<sup>a</sup> Xinyu Zhang,<sup>b,c</sup> Igor V. Zatovsky,<sup>d\*</sup> Igor V. Fesych,<sup>e</sup> ShilinLi,<sup>a</sup>  
Ruoyu Chen,<sup>a</sup> Marian Chufarov,<sup>a</sup> Oleksii Symonenko,<sup>a</sup> N.I. Klyui,<sup>d,f\*</sup> and  
Wei Han<sup>a\*</sup>

<sup>a</sup> Sino-Russian International Joint Laboratory for Clean Energy and Energy Conversion Technology, College of Physics, International Center of Future Science, Jilin university, Changchun 130012, P.R. China.

<sup>b</sup> Innovation Center of Computational Physics Methods and Software & State Key Laboratory of Superhard Materials, College of Physics, Jilin University, Changchun 130012, China.

<sup>c</sup> Geophysical Laboratory, Carnegie Institution of Washington, 5251 Broad Branch Road, Washington, District of Columbia 20015, USA.

<sup>d</sup> College of Physics, Jilin University, 2699 Qianjinst., Changchun 130012, P.R. China.

<sup>e</sup> Department of Chemistry, Taras Shevchenko National University of Kyiv, Volodymyrska st.,64/13, 01601, Kyiv, Ukraine.

<sup>f</sup> V. Lashkaryov Institute of Semiconductor Physics, NAS of Ukraine, 41 pr. Nauki, 03028 Kyiv, Ukraine.

Corresponding author

*E-mail address:* [zvigo@yandex.ru](mailto:zvigo@yandex.ru) (I.V. Zatovsky)

*E-mail address:* [klyuini@ukr.net](mailto:klyuini@ukr.net) (N.I. Klyui)

*E-mail address:* [whan@jlu.edu.cn](mailto:whan@jlu.edu.cn) (W. Han)

## Section "Electrochemical tests"

The specific capacitance ( $S_c$ ) value of BU-C/NF and NiLH-C/NF electrodes were calculated from the galvanostatic charge-discharge GCD curves according to the following equation:

$$S_c = (I \cdot \Delta t) / (m \cdot \Delta V), \quad (S1)$$

where  $I$  is the discharge current,  $\Delta t$  is discharge time,  $m$  is the mass of the active material and  $\Delta V$  is the potential window.

The energy density ( $S_E$ ) and power density ( $S_P$ ) of BU-C/NF//NiLH-C/NF supercapacitor was calculated using the following equations:

$$S_E = (S_c \cdot \Delta V^2) / 7200 \quad (S2)$$

$$S_P = (3600 \cdot S_E) / \Delta t \quad (S3)$$

The electrochemical cell EQ-STC15 (used to test model supercapacitor of BU-C/NF//NiLH-C/NF) has the following features: cell is made full stainless steel SS304; cell thickness 6 mm (cathode + separator + anode), working electrode diameter 15 mm; 6 mm height spacer inside the test cell to press down on the electrode and prevent the electrode from curling; sealed by electrolyte corrosive-proof PTFE O-rings; anti-corrosive Au coating on the cell contacts and inserts.

## Self-ignition of Bi + C composite

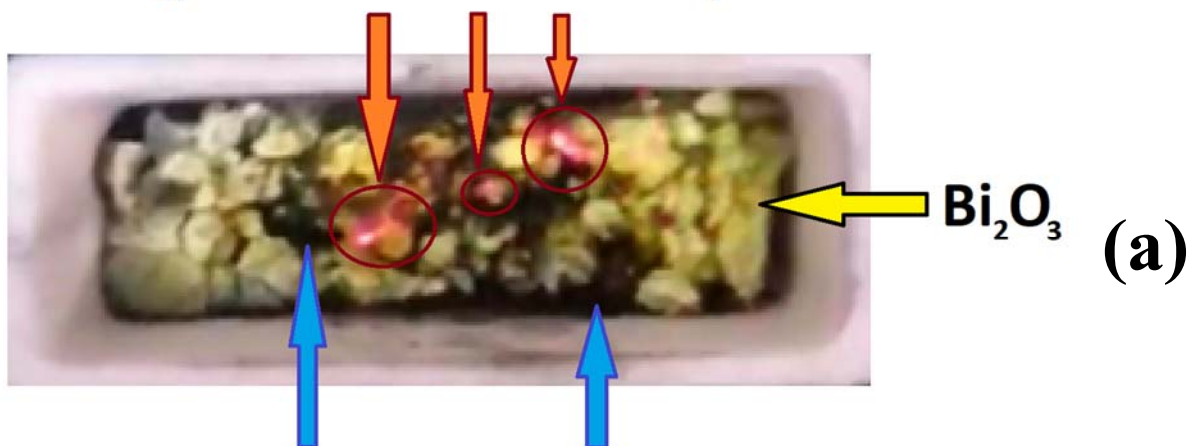

Pyrophoric Bi + C composite

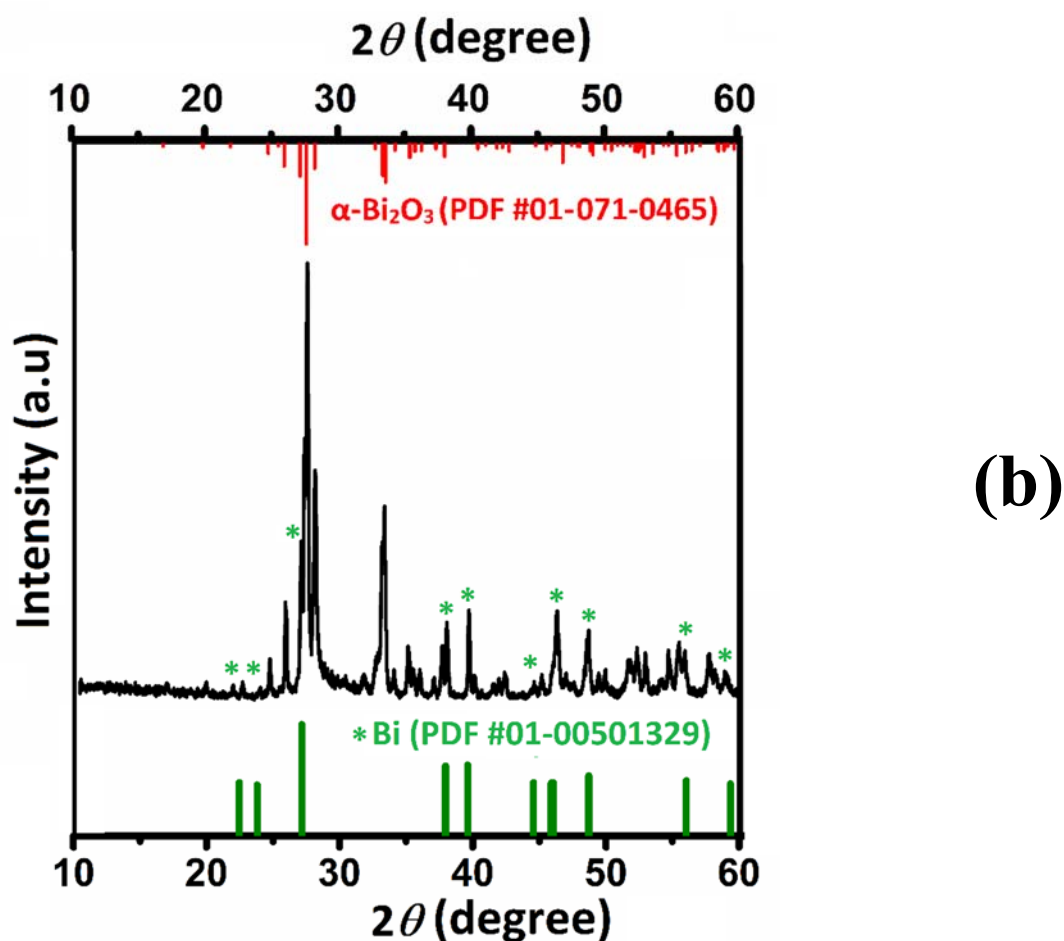

**Figure S1.** (a) Spontaneous combustion of the Bi + C composite when exposed to air (sample obtained by annealing pure Bi(cit) at 700 °C in argon atmosphere) and (b) XRD data after oxidation of bismuth and carbon in air (residual amount of metallic bismuth is less than 15 %wt.).

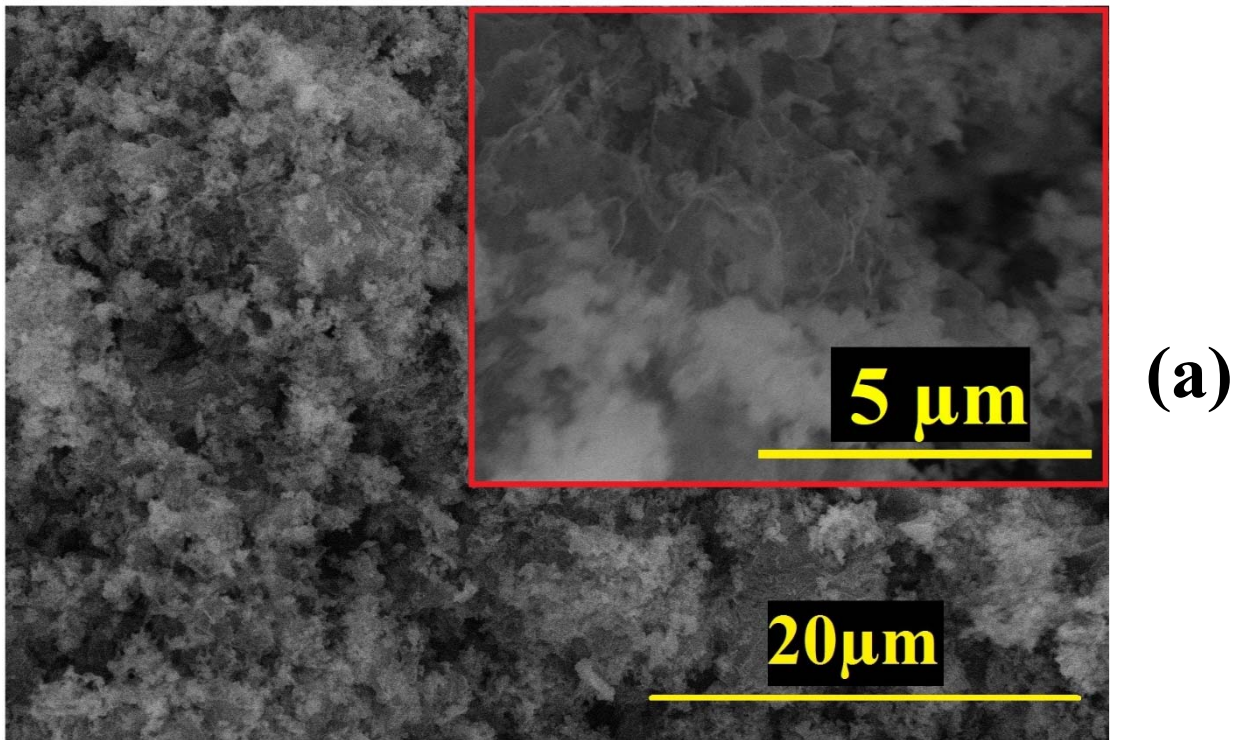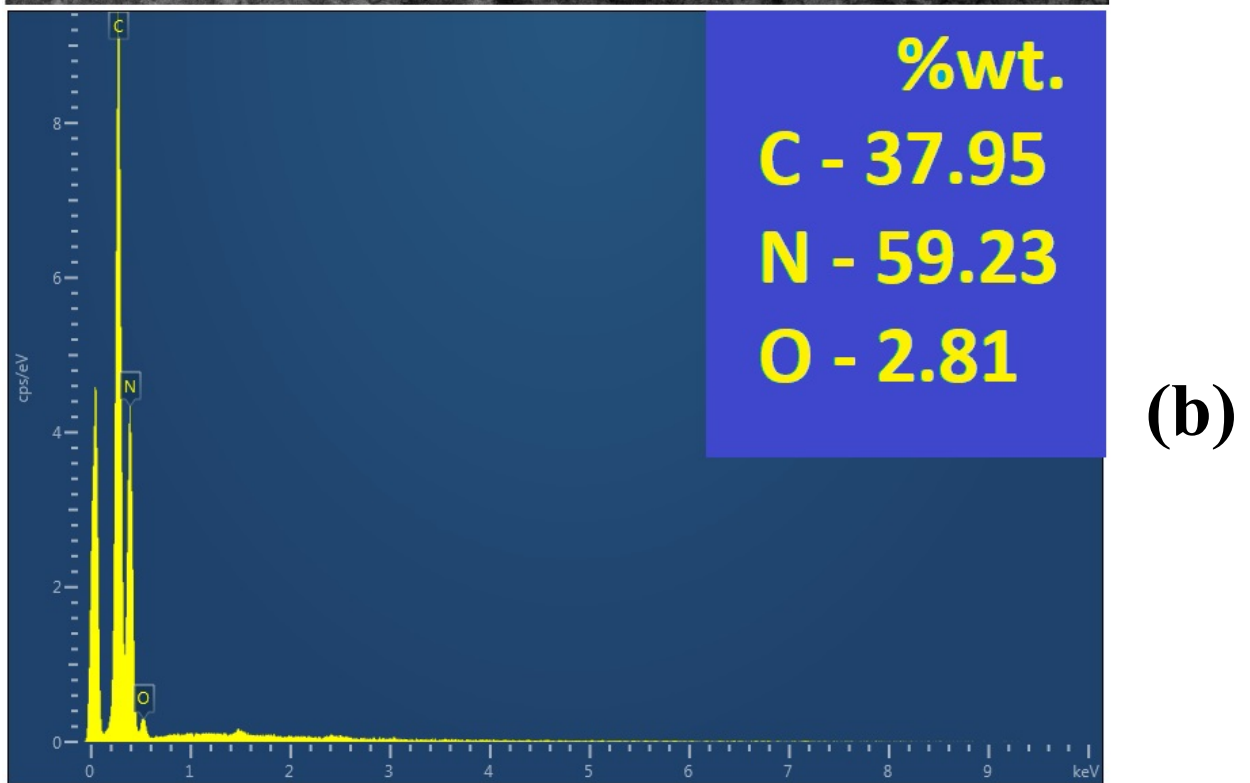

**Figure S2.** SEM images (a) and EDS (b) for Urea-550 sample.

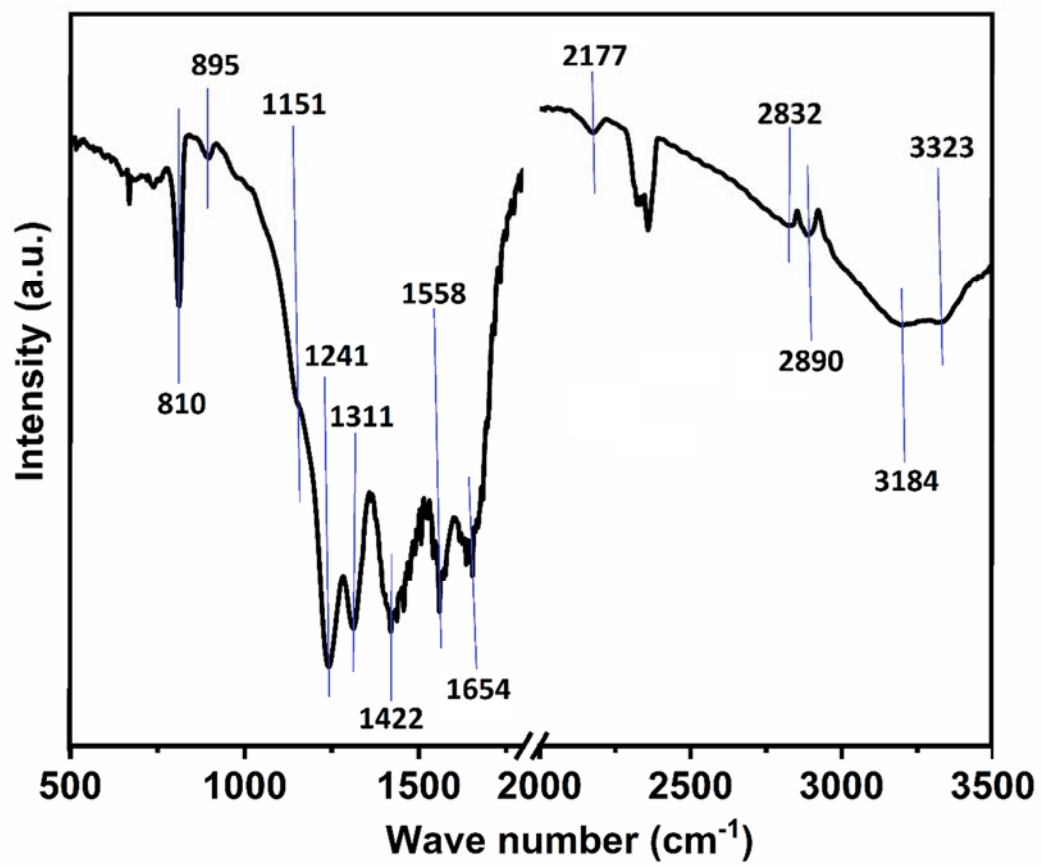

**Figure S3.** FTIR spectrum of Urea-550 sample.

**Table S1.**

Main absorption bands in the FTIR spectra of melem, melon and Urea-550.

| Absorption bands position, $\text{cm}^{-1}$                                       |                                                                                   |            | Absorption bands type    |
|-----------------------------------------------------------------------------------|-----------------------------------------------------------------------------------|------------|--------------------------|
| Melem                                                                             | Melon                                                                             | Urea-550   |                          |
| 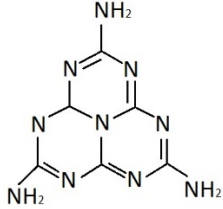 |  |            |                          |
| 802                                                                               | 805                                                                               | 810        | Condensed triazole rings |
| 976                                                                               | 890                                                                               | 895        | C-C and C-N bonds        |
| 1088, 1155                                                                        | 1206                                                                              | 1151       |                          |
| 1255                                                                              | 1236                                                                              | 1241       |                          |
| 1323                                                                              | 1320                                                                              | 1311       |                          |
| 1475                                                                              | 1410, 1465                                                                        | 1422       |                          |
| 1560                                                                              |                                                                                   | 1558       | Cyameluric ring          |
| -                                                                                 | 1580                                                                              | 1605       | Condensed triazole rings |
| -                                                                                 | 1640                                                                              | 1654       |                          |
| 2136, 2282                                                                        | -                                                                                 | 2177       |                          |
| 2494, 2570                                                                        | -                                                                                 | -          |                          |
| 2773                                                                              | -                                                                                 | 2832, 2890 |                          |
| 3103                                                                              | 3085                                                                              | -          | Amide<br>(-NH-)          |
| -                                                                                 | 3165, 3250                                                                        | 3184       |                          |
| 3336                                                                              | -                                                                                 | 3323       |                          |

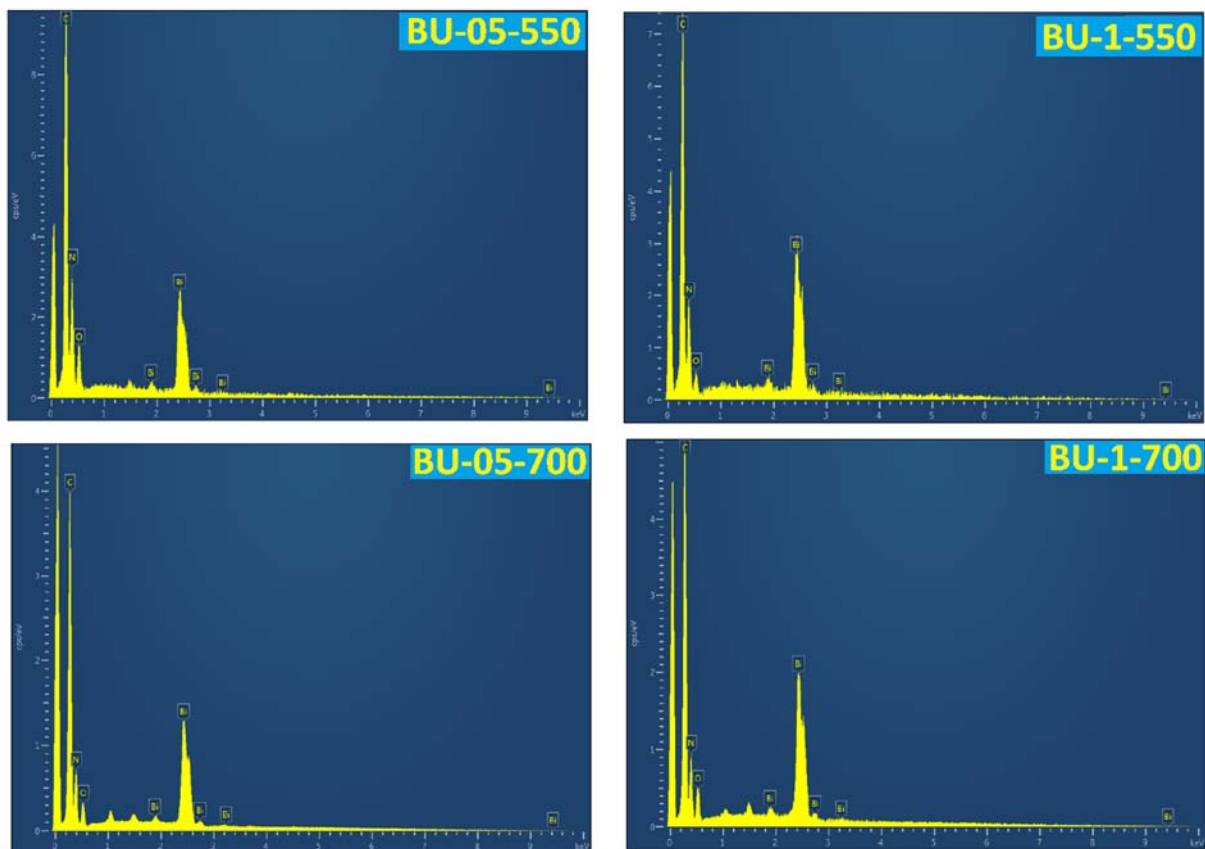

**Figure S4.** Results EDS for BU composites.

**Table S2.**

Element content and C: N ratio for BU according to EDS.

| Sample    | Found,% wt. |       |      |       | C:N ratio |
|-----------|-------------|-------|------|-------|-----------|
|           | C           | N     | O    | Bi    |           |
| BU-05-550 | 30.80       | 26.59 | 6.22 | 36.39 | 1.35      |
| BU-05-700 | 36.26       | 16.24 | 3.90 | 43.60 | 2.61      |
| BU-1-550  | 30.37       | 19.34 | 2.81 | 47.48 | 1.83      |
| BU-1-700  | 31.21       | 12.93 | 3.73 | 52.12 | 2.81      |

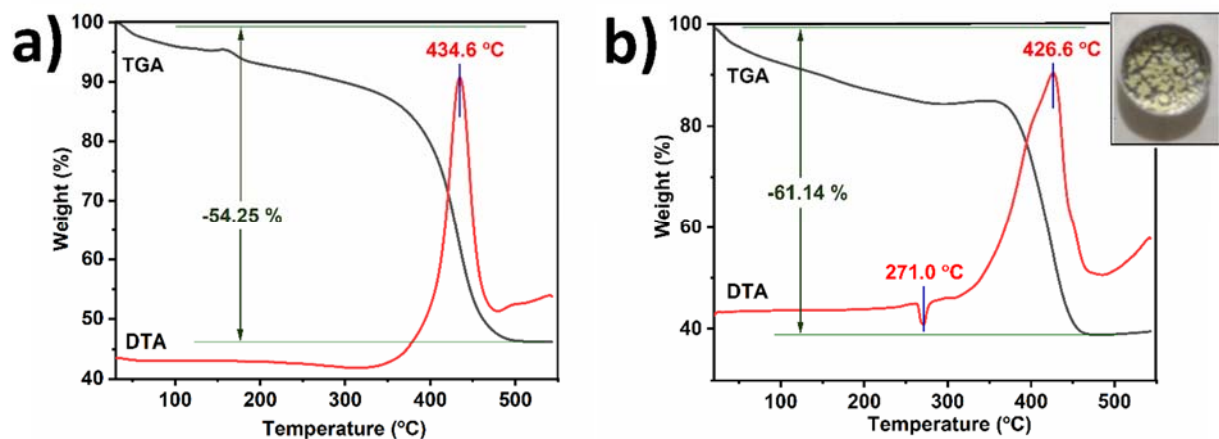

**Figure S5.** DG-DTA results for (a) BU-1-550 and (b) BU-05-700 (Insert: Bi<sub>2</sub>O<sub>3</sub> obtained after DG-DTA).

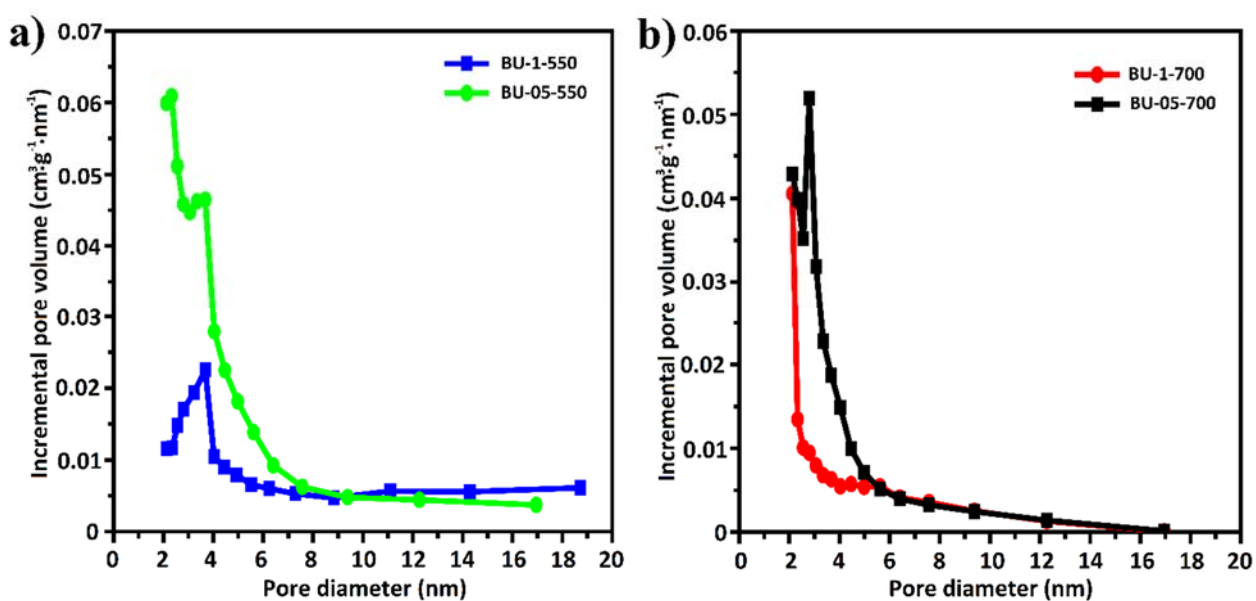

**Figure S6.** Barrett–Joyner–Halenda (BJH) pore size distribution curves of BU composites.



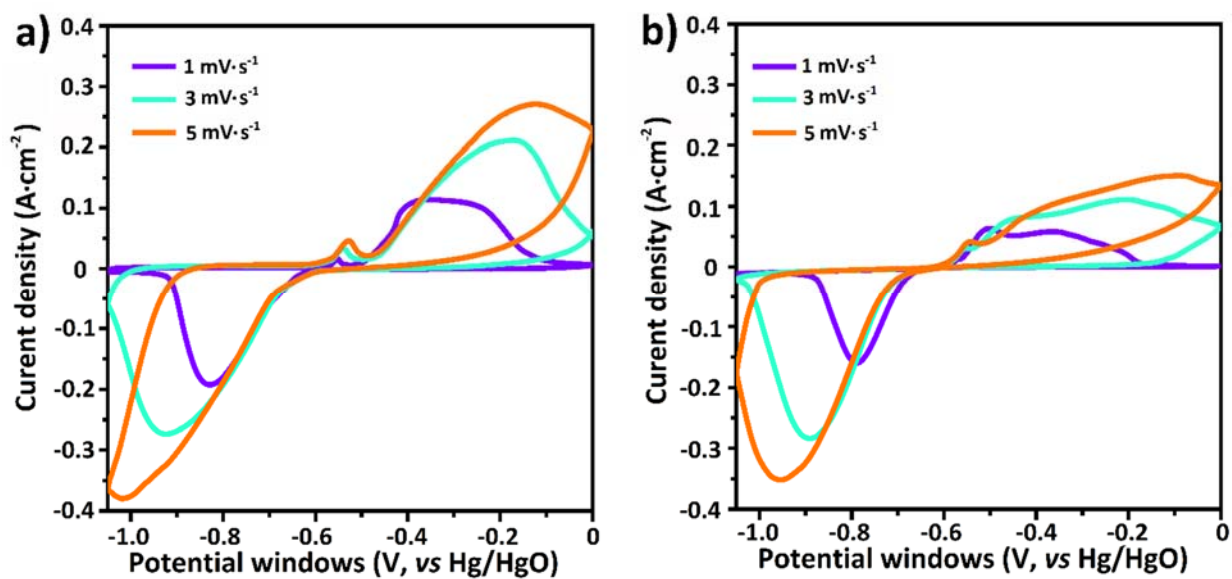

**Figure S7.** Cyclic voltammograms for (a) BU(05-700)-C/NF and (b) BU(1-550)-C/NF electrodes at different scan rates.

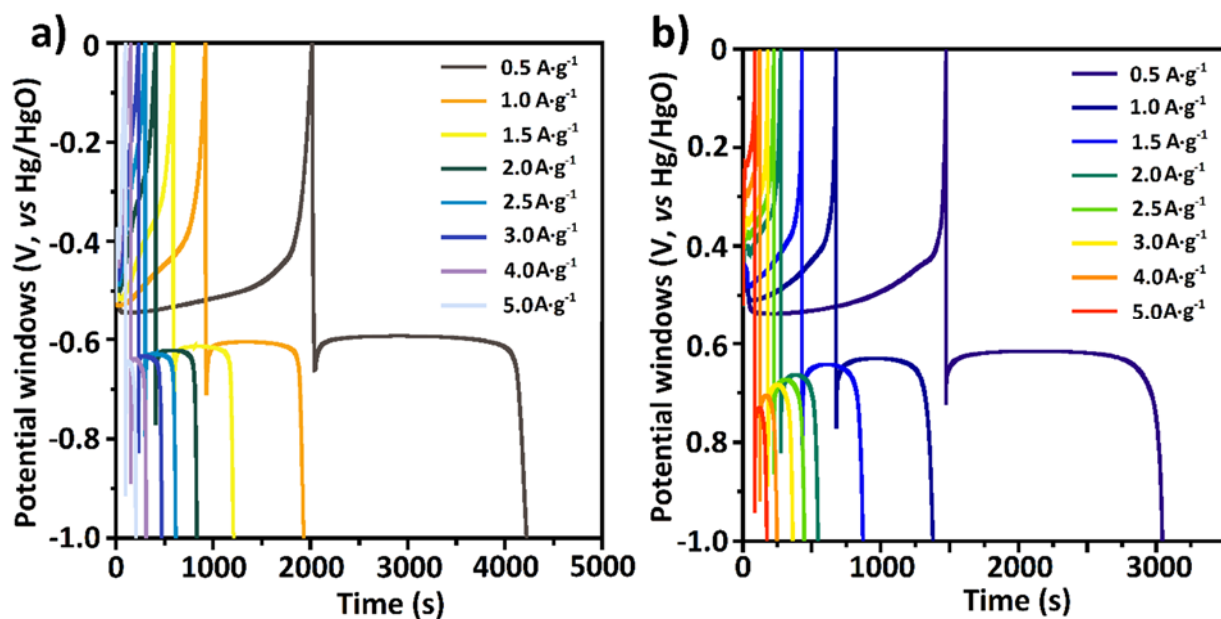

**Figure S8.** The galvanostatic charge-discharge curves for (a) BU(05-700)-C/NF and (b) BU(1-550)-C/NF electrodes at different current densities.

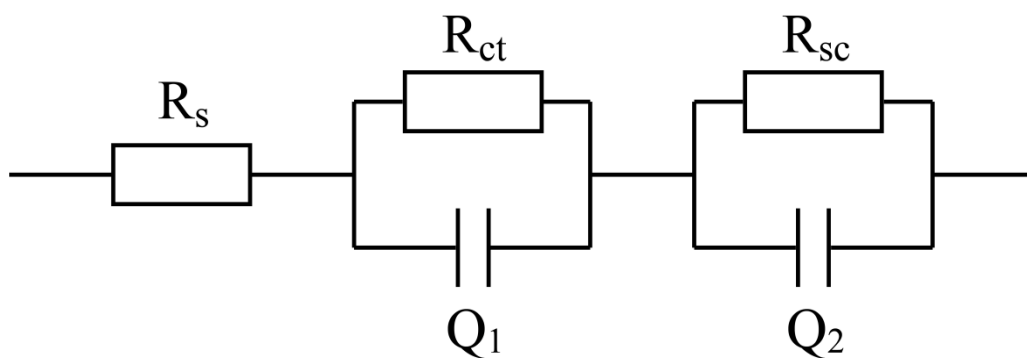

**Figure S9.** The equivalent scheme for EIS measurement:  $R_s$  – solution resistance,  $R_{sc}$  – specific space-charge resistance,  $R_{ct}$  – specific charge transfer resistance,  $Q_1$  and  $Q_2$  are the constant phase elements (CPE) for the electrolyte/electrode interface and electrode surface, respectively.

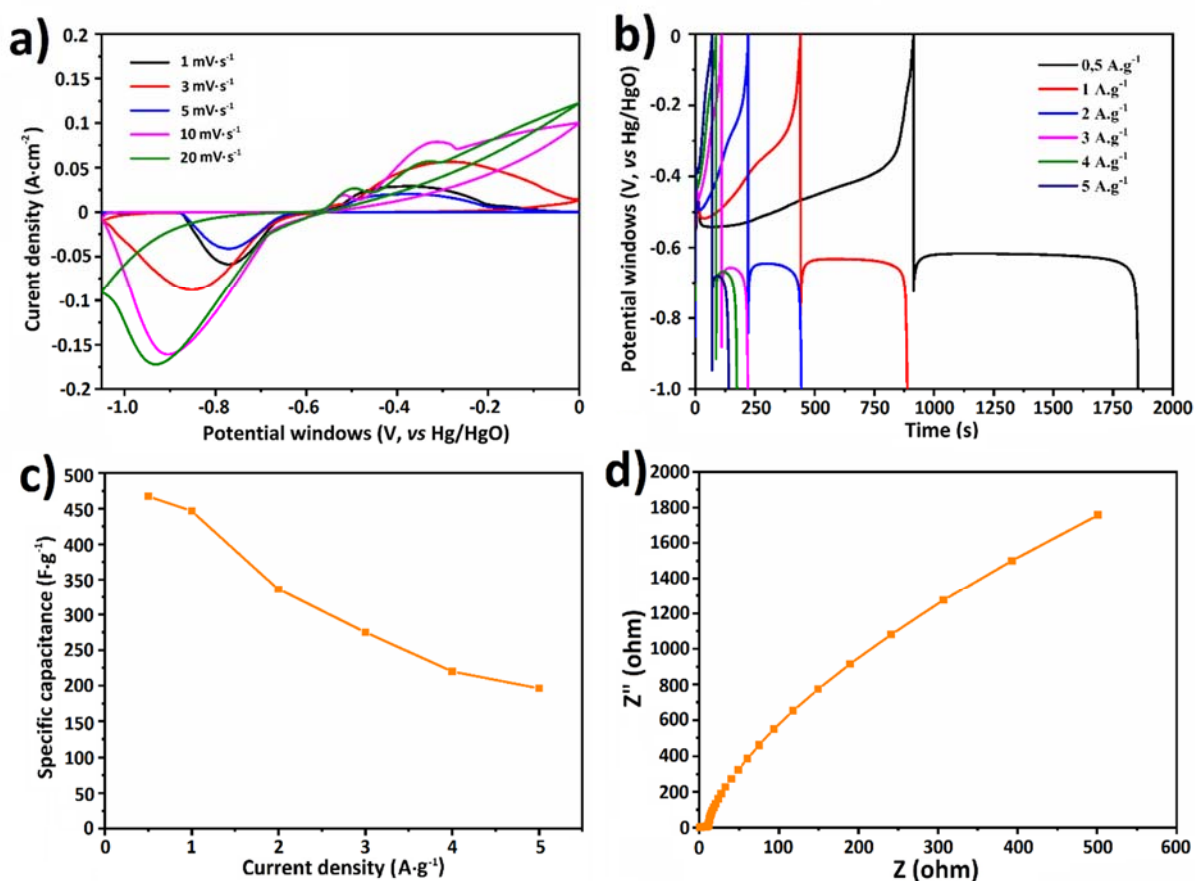

**Figure S10.** Electrochemical tests for Bi-700-C/NF\* electrode: (a) CV curves at different scan rates; (b) galvanostatic charge–discharge curves at different current densities; (c) specific capacitances of the electrode at different current densities; (d) result AC impedance spectroscopy.

\*The Bi-700-C/NF electrode was fabricated by coating strips of nickel foam with active paste, which consists of 85 % wt. electroactive material (prepared from thermally decomposed pure Bi(cit) at 700 °C in an Ar atmosphere) with a mixture of 10 % wt. SP carbon and 5 % wt. PTFE. The resulting electrode was dried in vacuum at 60 °C for 24 hours.

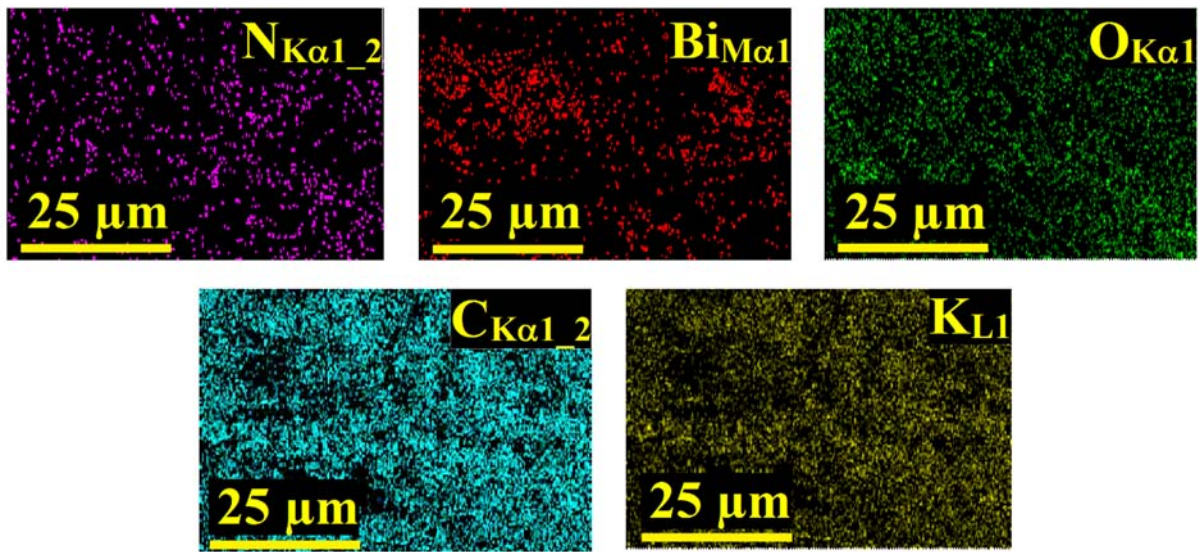

**Figure S11.** Elemental mapping for BU(1-700)-C/NF electrode after GCD the process.

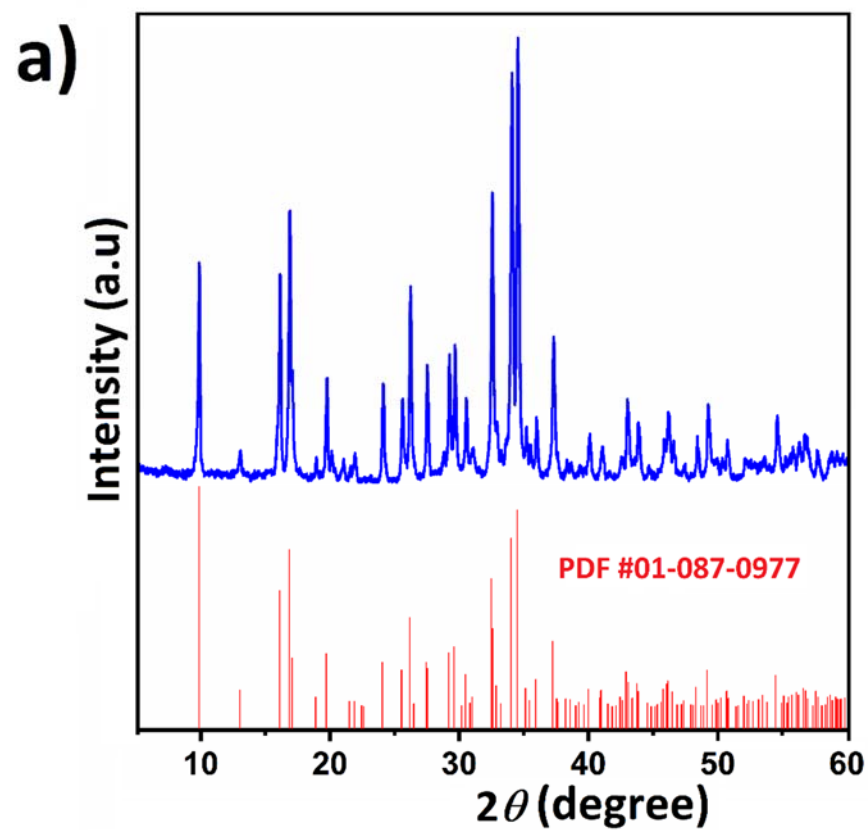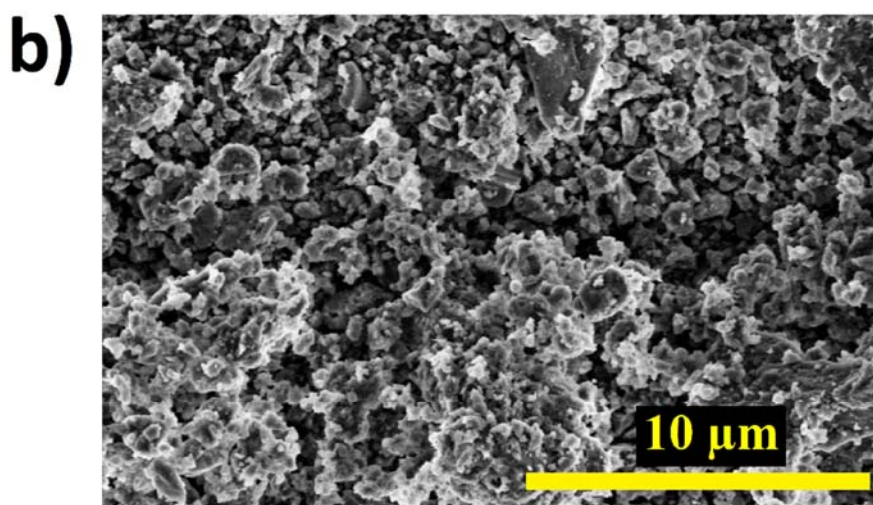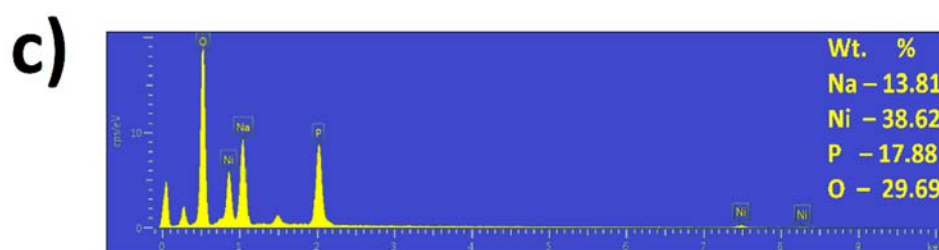

**Figure S12.** Characterization of the obtained nanoparticles  $\text{Na}_4\text{Ni}_3\text{P}_4\text{O}_{15}$ : (a) XRD result (in comparison with PDF2 #01-087-0977 for  $\text{Na}_4\text{Ni}_3(\text{PO}_4)_2\text{P}_2\text{O}_7$ ); (b) SEM image; (c) result EDS.



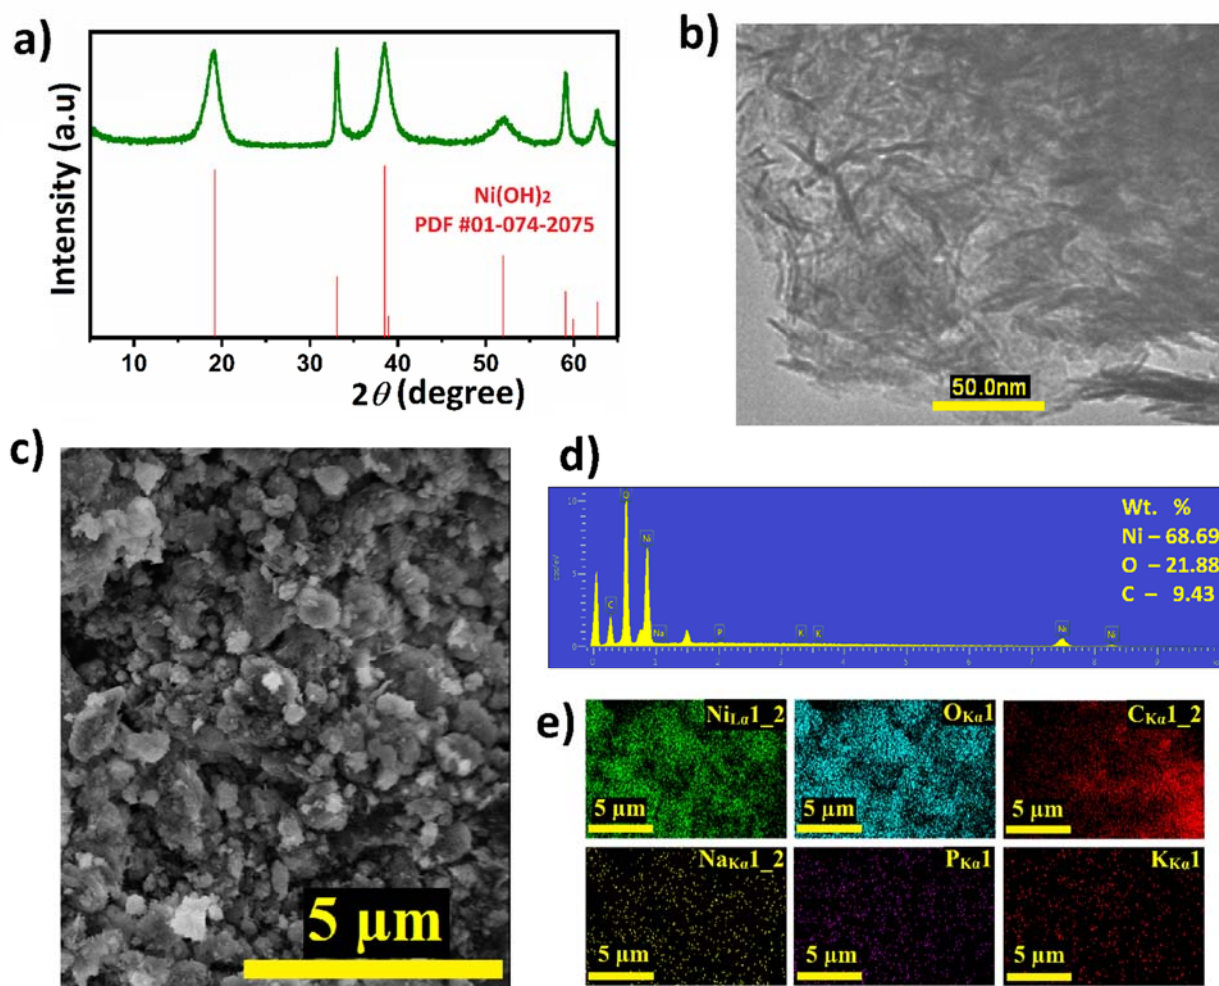

**Figure S13.** Study of the NiLH-C/NF electrode after *in situ* conversion of phosphate to 2D-nanosheets Ni(OH)<sub>2</sub> (in a 6 M KOH solution): (a) XRD data; (b) TEM image (crumbs of electrode material were separated from surface of NF current collector; used transmission electron microscopy by JEOL JSM 2010F, recorded at 200 kV); (c) SEM image for NiLH-C/NF electrode; (d) result EDS; (e) elemental mapping for NiLH-C/NF electrode.

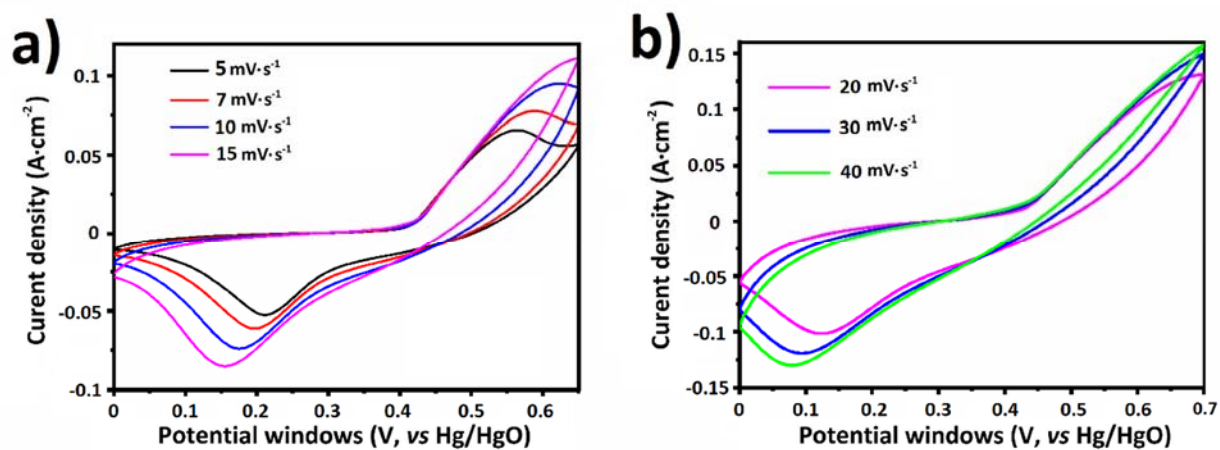

**Figure S14.** CV curves at different scan rates for NiLH-C/NF electrode: (a) scanning rate from 5 to 15 mV·s<sup>-1</sup>; (b) scanning rate from 20 to 40 mV·s<sup>-1</sup>.

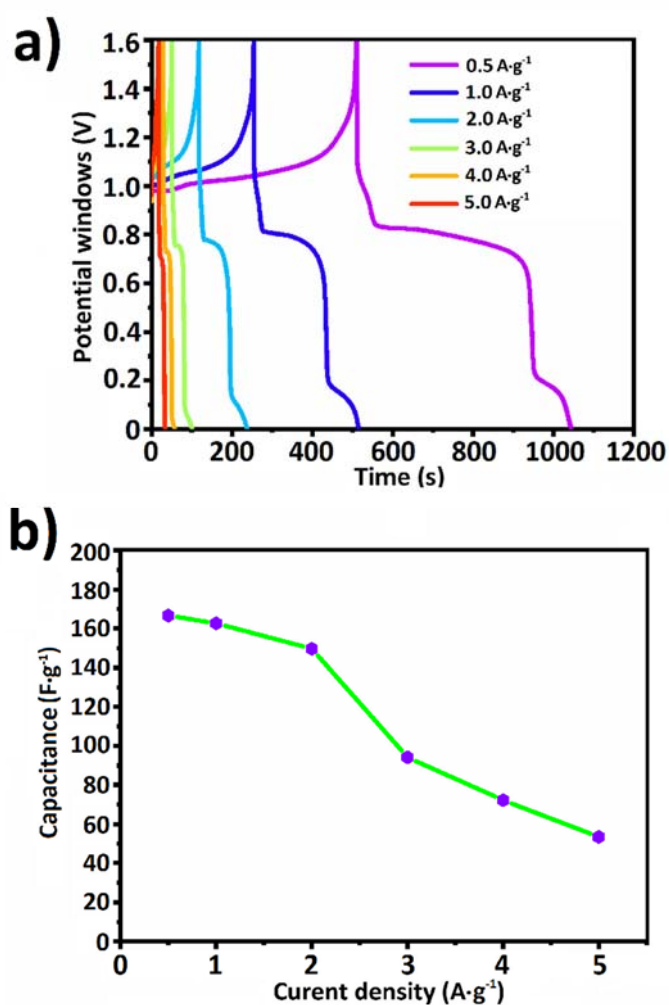

**Fig. S15.** Electrochemical tests for BU-C/NF//NiLH-C/NF device: (a) galvanostatic charge–discharge curves at different current densities; (b) specific capacitances of the supercapacitor at different current densities.
